# Supplementary material
Source: PubMed Central journal article supplement (PMC1482815)
Supplement: bj3960565add.pdf [file bj3960565add.pdf]

## Supplementary data

### Legends to Supplementary Figures

#### **Supplementary Figure S1 Secondary structures of the conserved domain (the 1070 rRNA region) of 23S/28S rRNA to which the stalk protein complexes bind.**

(A) The domain of *P. horikoshii* 23S rRNA containing the residues 1142-1240. (B) The domain of rat 28S rRNA containing the residues 1841-1939. (C) The domain of *E. coli* 23S rRNA containing the residues 1029-1127. A possible binding site for EF-G/eEF-2 is arrowed.

#### **Supplementary Figure S2 Comparison of amino acid sequences of L10-like proteins**

(A) Amino acid sequence alignment of P0 homologues from *P. horikoshii* (Pho), silkworm (*Bombyx mori*, Bmo), yeast (*Saccharocyces cerevisiae*, Sce) and human (*Homo sapiens*, Hsa). The sequences were aligned using T-coffee (Supplementary references 1) and Genetyx-Mac (ver. 12.2.0) programs. The similar and identical amino acid residues are indicated with dots and asterisks, respectively. (B) The sequence of *Escherichia coli* (Eco) L10. Because of its small size and low sequence identity with the P0-like proteins from eukaryotes and archaeobacteria, this sequence is shown separately. Putative homologous amino acids are indicated with large dots.

### **Supplementary Figure S3 Comparison of amino acid sequences of L7/L12-like protein**

Amino acid sequence alignments of P1 (A) and P2 (B) homologues from silkworm (*B. mori*, Bmo), yeast (*S. cerevisiae*, Sce) and human (*H. sapiens*, Hsa), together with *P. horikoshii* (Pho) Ph-L12. The sequences were aligned as described in Supplementary Fig. 2. The similar and identical amino acid residues are indicated with dots and asterisks, respectively. (C) The sequence of *E. coli* (Eco) L7/L12. Because of the very low sequence identity with its eukaryotic and archaeobacterial counterparts, this sequence is shown separately.

### **Supplementary Figure S4 Comparison of amino acid sequences of L11-like protein**

(A) Amino acid sequence alignment of L11-like proteins from *P. horikoshii* (Pho), silkworm (*B. mori*, Bmo), yeast (*S. cerevisiae*, Sce), human (*H. sapiens*, Hsa), and *E. coli* (Eco). The sequences were aligned as described in Supplementary Fig. 2. The similar and identical amino acid residues are indicated by dots and asterisks, respectively.

### **Supplementary reference**

- 1 Notredame, C., Higgins, D. G. and Heringa, J. (2000) T-Coffee: A novel method for fast and accurate multiple sequence alignment. *J. Mol. Biol.* **302**, 205-217

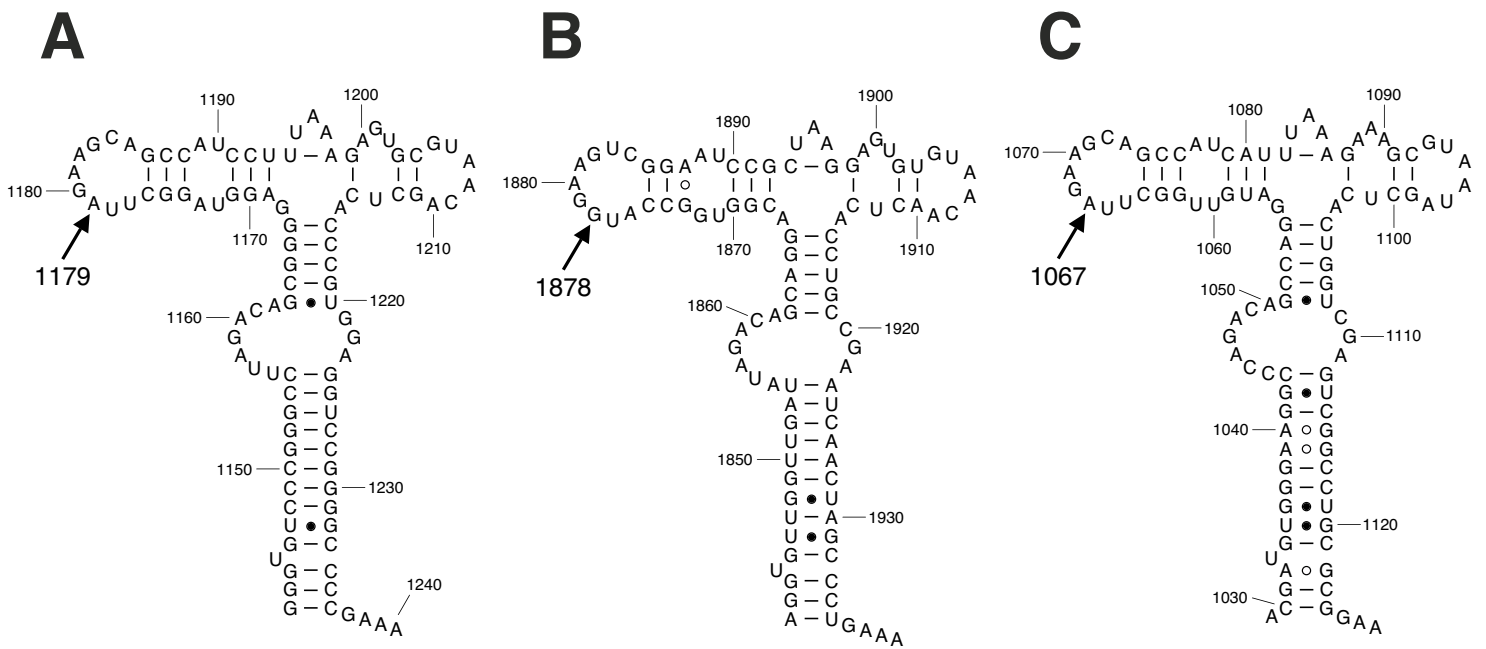

Figure S1

# A

|         |     |                                                               |     |
|---------|-----|---------------------------------------------------------------|-----|
| Pho P0  | 1   | M--AHVAEWKKKEVEELAKLIKSYPVIALVDVSSMPAYPLSQMRRILIREN           | 48  |
| Bmo P0  | 1   | MGREDKATWKSNYFVKIIQLLDEYPKCFIVGADNVGSQQMQQIRISLRGS            | 50  |
| Scce P0 | 1   | M--GGIREKKAEYFAKLREYLEEYKSLFVVGVDNVSSQQMHVVRKELRGR            | 48  |
| Hsa P0  | 1   | MPREDRATWKSNYFLKIIQLLDDYPKCFIVGADNVGSKQMQQIRMSLRGK            | 50  |
|         |     | * . . . * . . . . . * . . * . . . . . . . . * . *             |     |
| Pho P0  | 49  | GLLLRVSRNTLIELAIKKAAKELGKPELEKLV EYIDRGAGILVTNMNPFK           | 98  |
| Bmo P0  | 51  | SIVL-MGKNTMMRKAIKDHLD--NNPALEKLLPHIKGNVGFVTRGDLVE             | 97  |
| Scce P0 | 49  | AVVL-MGKNTMVRRAIRGFLS--DLPDFEKL LPFVKGNVGFVFTNEPLTE           | 95  |
| Hsa P0  | 51  | AVVL-MGKNTMMRKAIRGHLE--NNPALEKLLPHIRGNVGFVFTKEDLTE            | 97  |
|         |     | * . . . ** . . ** . . * . *** . . . . * . . . * . . .         |     |
| Pho P0  | 99  | LYKFLQQRQPAPAKPGAVVPKDVVVPAGPTPLAPGPIVGMQALGIPAR              | 148 |
| Bmo P0  | 98  | VRDKLLENKVQAPARPGAIAPLSVVIPAHNTGLGPEK-TSFFQALS IPTK           | 146 |
| Scce P0 | 96  | IKNVIVSNRVAAPARAGAVAPEDIWVRVAVNTGMEPGK-TSFFQALGVPTK           | 144 |
| Hsa P0  | 98  | IRDMLLANKVPAAARAGAIAPCEVTVPAQNTGLGPEK-TSFFQALGITTK            | 146 |
|         |     | . * . * . * . ** * . . . * . * . . * . . . . . *** . . . . .  |     |
| Pho P0  | 149 | IEKGVITIQDTTVLKAGEVITPELANILNALGIQPLEVGLDVLAVYEDG             | 198 |
| Bmo P0  | 147 | ISKGTIEIINDVHILKPGDKVGASEATLLNMLNISPFSYGLVVKQVYDSG            | 196 |
| Scce P0 | 145 | IARGTIEIVSDVKVVDAGNKVGQSEASLLNLLNISPFTFGLTVVQVYDNG            | 194 |
| Hsa P0  | 147 | ISRGTIEILSDVQLIKTGDKVGASEATLLNMLNISPFSFGLVIQQVFDNG            | 196 |
|         |     | * * . . . * * . . * . . . . * . ** * . * . * . ** . . * . . * |     |
| Pho P0  | 199 | IVYTPDVLAIDEQEYIDMLQKAYMHAFNLAVNIA YPTPETIEAIIQKAFL           | 248 |
| Bmo P0  | 197 | TIFAPEILDIKPEDLRAKFQAGVANVAALSLAIGYPTIASAPHSIANGFK            | 246 |
| Scce P0 | 195 | QVFPSSILDITDEELVSHFVSAVSTIASISLAIGYPTLPSVGH TLINNYK           | 244 |
| Hsa P0  | 197 | SIYNPEVLDITEETLHSRFL EGVNRVASVCLQIGYPTVASVPHSIINGYK           | 246 |
|         |     | . * . * . . . . . . . . * . *** . . . . . . . . . .           |     |
| Pho P0  | 249 | NAKTVAIEAGYITKETIQDIIGRAF RAMELLLAQQLPEDVLDEKTKELLSA          | 298 |
| Bmo P0  | 247 | NLLAIAAVTEVEFEFEE-ATTIKEFI-----KDP SKFAA                      | 277 |
| Scce P0 | 245 | DLLAVAIAASYHYPE-IEDLVDR I-----ENPEKYAA                        | 275 |
| Hsa P0  | 247 | RVLALSVETDYTFPL-AEKVKAF L-----ADPSAFVA                        | 277 |
|         |     | . . . . . . . . . . . . . . . . . . . . . . . . *             |     |
| Pho P0  | 299 | QAQ-VAVATQPSEEEKKEEEKTEEE EKEEEEASEEEALAGLSALFG               | 342 |
| Bmo P0  | 278 | VAAAVAPSAAAAPAEKKEEKKE-EKEE-EE-SDDDMGFG---LFD                 | 316 |
| Scce P0 | 276 | AAP-AATSAASGDAAPAE EAAA-E-EE-EE-SDDDMGFG---LFD                | 312 |
| Hsa P0  | 278 | AAPVAAATTAAPAAAAAPAKVE-AKEESEE-SDEDMGFG---LFD                 | 317 |
|         |     | * * . . . . . * . ** * . . . . * . ** .                       |     |

# B

|         |     |                                                      |     |
|---------|-----|------------------------------------------------------|-----|
| Eco L10 | 1   | MALNLQDKQAIVAEVSEVAKGALS AVVADSRGVTVDKMT ELRKAGREAGV | 50  |
|         |     | ● . . . . . ● . . . . . ● . . . . . ● . . . . .      |     |
|         | 51  | YMRVVRNTLLRRAVEGTPFECLKDAFVGPTLIAYSMEHPGAAARLFKEFA   | 100 |
|         |     | ● . . . . . ● . . . . . ● . . . . . ● . . . . .      |     |
|         | 101 | KANAKFEVKAAAFEGELIPASQIDRLATLPTYEEAIARLMATMKEASAGK   | 150 |
|         |     | ● . . . . . ● . . . . . ● . . . . . ● . . . . .      |     |
|         | 151 | LVRTLAAVRDAKEEA                                      | 165 |

Figure S2

# A

|         |     |                                                      |     |
|---------|-----|------------------------------------------------------|-----|
| Pho L12 | 1   | M-----EYVYAALLLHSVGKEINEENLKAVLQAAGVEPEEARIKALVAA    | 44  |
| Bmo P1  | 1   | MVSKAELACVYSALILVDDDDVAVTGEKISTILKAAAVDVEPYWPLFAKA   | 50  |
| Scs P1A | 1   | M--STESALSYAALILADSEIEISSEKLLTLTNAANVPVENIWADIFAKA   | 48  |
| Scs P1B | 1   | M---SDSIISFAAFILADAGLEITSDNLLTITKAAGANVDNVWADVAKA    | 47  |
| Hsa P1  | 1   | MASVSELACIYSALILHDDEVTVTEDKINALIKAAGVNVPEFPWPLFAKA   | 50  |
|         |     | * . . . * . . . . . * . . . . . *                    |     |
| Pho L12 | 45  | LEGVNIDEVIEKAA---MPVAVAAAPAAAPAEAGGEEKKEEEKKEEEEEKE  | 91  |
| Bmo P1  | 51  | LEGINVRDLITNIGSGVGAAPA---AGGAPAAAAAGAPAEKKEEKKEE     | 97  |
| Scs P1A | 49  | LDGQNLKDLLVNF-S---AGAAAPAGVAGGVAGGEAGEAEAEKEEEE---E  | 91  |
| Scs P1B | 48  | LEGKDLKEILSGFHN---AGPVAGAGAASGAAAAGGDAAAEEEEEKEE---E | 91  |
| Hsa P1  | 51  | LAVNIGSLICNVGAG-GPAPAAGAAPAGGPAPSTAAAPAEKKEKVEAKKE   | 99  |
|         |     | * . . . . . * . . . . . * . . . . . *                |     |
| Pho L12 | 92  | E-EVSEEEALAGLSALFG                                   | 108 |
| Bmo P1  | 98  | EPEESDDDMGFG---LFD                                   | 112 |
| Scs P1A | 92  | AKEESDDDMGFG---LFD                                   | 106 |
| Scs P1B | 92  | AAEESDDDMGFG---LFD                                   | 106 |
| Hsa P1  | 100 | ESEESDDDMGFG---LFD                                   | 114 |
|         |     | . * . * . . . . * . . . . . *                        |     |

# B

|         |     |                                                      |     |
|---------|-----|------------------------------------------------------|-----|
| Pho L12 | 1   | MEYVYAALLLHSVGKEI-NEENLKAVLQAAGVEPEEARIKALVAALEGV-   | 48  |
| Bmo P2  | 1   | MRYVAAYLLAVLGGKTPAAADVEKILSSVGIEADAELKKKVVITELNGK-   | 49  |
| Scs P2A | 1   | MKYLAAYLLLNAAAGNT-PDATKIKAILESVGIEIEDEKVSSVLSALEGK-  | 48  |
| Scs P2B | 1   | MKYLAAYLLLQGGNAAPSAADIKAVVESVGAEVDEARINELLSLEGKG     | 50  |
| Hsa P2  | 1   | MRYVASYLALALGGNSSPSAKDIKKILDSVGIEADDDRLNKVISELNGK-   | 49  |
|         |     | * * . . . * . * . . . . . * . * . . . *              |     |
| Pho L12 | 49  | NIDEVIEK-----AAMP-----VAVAAAPAAAPAEAGGEEKKEEEKK      | 85  |
| Bmo P2  | 50  | DVEQLIAAGREKLSSMPVGGG-----APAAAAAAPAA-AAAEEKKEDKK    | 93  |
| Scs P2A | 49  | SVDELITEGNEKLAAPVPA-----AGPASAGGAAAA-SGDAAAEEEEEKE   | 89  |
| Scs P2B | 51  | SLEETIAEGQKKFATVPTGG-----ASSAAAGAAGAA-AGGDAAAEEEEEKE | 93  |
| Hsa P2  | 50  | NIEDVIAQGIGKLVAPAGGAVAVSAAPGSAAPAAGSAPAAAEEKKDEKK    | 99  |
|         |     | . . * . . . . * . . . . . * . . . . . *              |     |
| Pho L12 | 86  | EEEEEEEEVSEEEALAGLSALFG                              | 108 |
| Bmo P2  | 94  | EKKEDSE-SDDDMGFG---LFD                               | 112 |
| Scs P2A | 90  | EEAAE--E-SDDDMGFG---LFD                              | 106 |
| Scs P2B | 94  | EEAKE--E-SDDDMGFG---LFD                              | 110 |
| Hsa P2  | 100 | EESEE---SDDDMGFG---LFD                               | 115 |
|         |     | ** . . * . . . . * . . . . . *                       |     |

# C

|            |     |                                                    |     |
|------------|-----|----------------------------------------------------|-----|
| Eco L7/L12 | 1   | MSITKDQIIEAVAAMSVMVVELISAMEEKFGVSAAAA VAVAAGPVEAAE | 50  |
|            | 51  | EKTEFDVILKAAGANKVAVIKAVRGATGLGLKEAKDLVESAPAALKEGVS | 100 |
|            | 101 | KDDAEALKKALEEAGAEVEVK                              | 121 |

Figure S3

|          |     |                                                     |     |
|----------|-----|-----------------------------------------------------|-----|
| Pho L11  | 1   | M-----KKQVVEVLVEGGKATPGPPLGPAIGPLGLNVKQVVDKI-NEA    | 42  |
| Bmo eL12 | 1   | MPPKFDPNKIKIVNLRVGGVEGATSSSLAPKIGPLGLSPKKVGGDI-AGA  | 49  |
| Scs eL12 | 1   | MPPKFDPNKIKVLYLRAVGGVEGASALAPKIGPLGLSPKKVGGDI-AGA   | 49  |
| Hsa eL12 | 1   | MPPKFDPNKIKVVYLRCTGGEVGSALAPKIGPLGLSPKKVGGDI-AGA    | 49  |
| Eco L11  | 1   | M----AKKVQAYVKLQVAAGMANPSPVGPALGQQGVNIMEFCKAFNAKT   | 46  |
|          |     | *.....*.....*.....*                                 |     |
| Pho L11  | 43  | TKEFAGMQVPVKIIVDPVTKQFEIEV-GVPPTSQLIKKELGLEKGSGEPK  | 91  |
| Bmo eL12 | 50  | TSDWKGLKITVQLTVQ--NRQAQIAV--VPSAAALIIRALKEPPRDRKKQ  | 95  |
| Scs eL12 | 50  | TKEFKGKIVTVQLKIQ--NRQAAASV--VPSASSLVITALKEPPRDRKKD  | 95  |
| Hsa eL12 | 50  | TGDWKGLRITVKLTIQ--NRQAQIEV--VPSASALIICALKEPPRDRKKQ  | 95  |
| Eco L11  | 47  | DSIEKGLPIPVVITVY--ADRSFTFVTKTPPAAVLLKKA--AGIKSGSGK  | 92  |
|          |     | .*...*.....*.....*                                  |     |
| Pho L11  | 92  | HNIV--GNLTMEQVIKIAKMKRSQMLALTLKAAAKEVIGTALSMGVTVEG  | 139 |
| Bmo eL12 | 96  | KNIKHNGNISLEDVVGIAKIMRNRSMARYLSGSVKEILGTAQSVGCTVEG  | 145 |
| Scs eL12 | 96  | KNVKHSGNIQLDEIIEIARQMRDKSFGRTLASVTKEILGTAQSVGCRVDF  | 145 |
| Hsa eL12 | 96  | KNIKHSGNITFDEIVNIARQMRHRSARELSGTIKEILGTAQSVGCNVDG   | 145 |
| Eco L11  | 93  | PNKDKVGGKISRQLQEIQAQTKAADMTGADIEAMTRSIEGTARSMGLVVED | 142 |
|          |     | .*...*.....**.....***.*.*.*..                       |     |
| Pho L11  | 140 | KDPRIVQREIDEGVYDELFEKAEKE                           | 164 |
| Bmo eL12 | 146 | RPPHDLIDDINSGALTIDE-----                            | 164 |
| Scs eL12 | 146 | KNPHDIIEGINAGEIEIPEN-----                           | 165 |
| Hsa eL12 | 146 | RHPHDIIDDINSGAVECPAS-----                           | 165 |
| Eco L11  | 142 | -----                                               | 142 |
|          |     | .....                                               |     |

Figure S4
